# Supplementary material for: Widely linear Markov signals
Source: Springer Nature journal article supplement (doi:10.1186/1687-6180-2012-256), 2012-12-01

(a) True correlation function

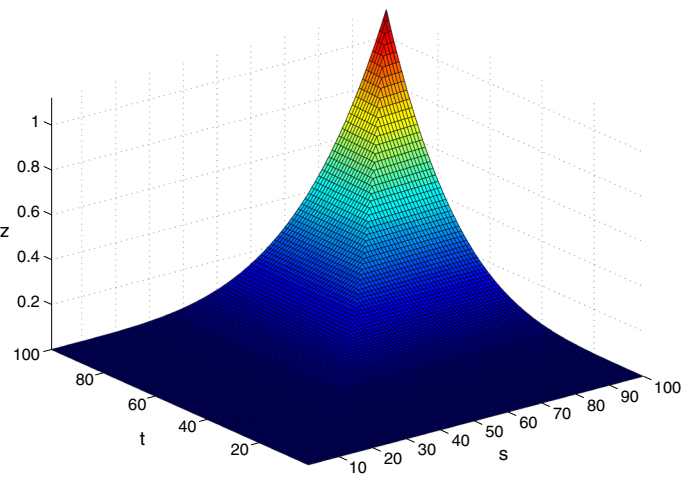

(b) True complementary function

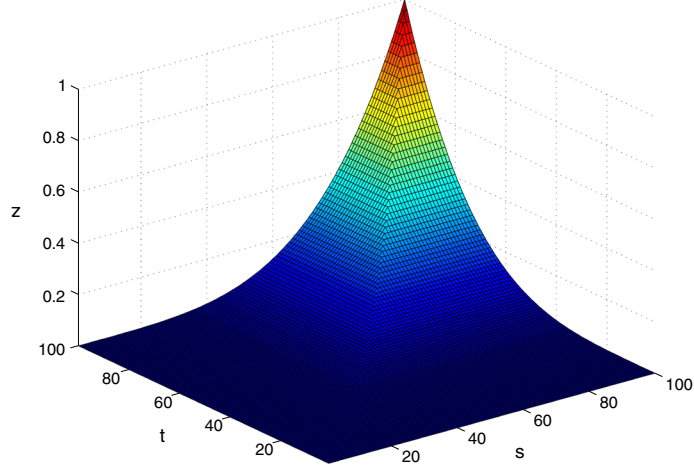

(c) Simulated correlation function for model 1

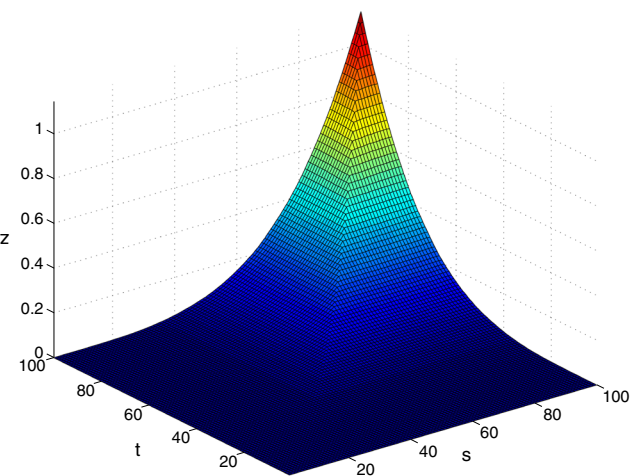

(d) Simulated complementary function for model 1

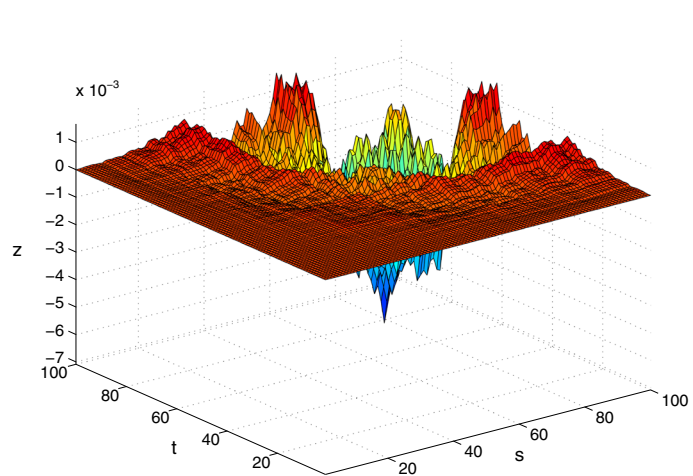

(e) Simulated correlation function for model 2

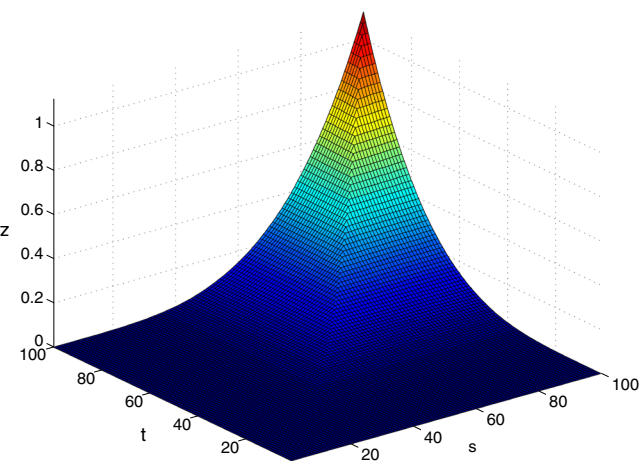

(f) Simulated complementary function for model 2

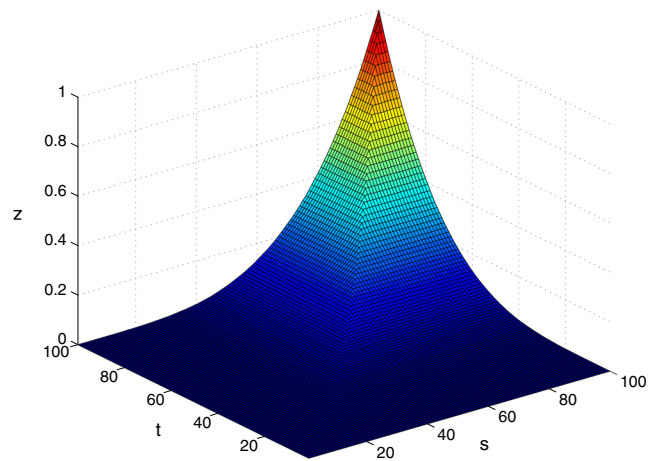

Supplement: 13634_2012_412_MOESM1_ESM.pdf [file 13634_2012_412_MOESM1_ESM.pdf]
