# Supplementary material for: Widely linear Markov signals
Source: Springer Nature journal article supplement (doi:10.1186/1687-6180-2012-256), 2012-12-01

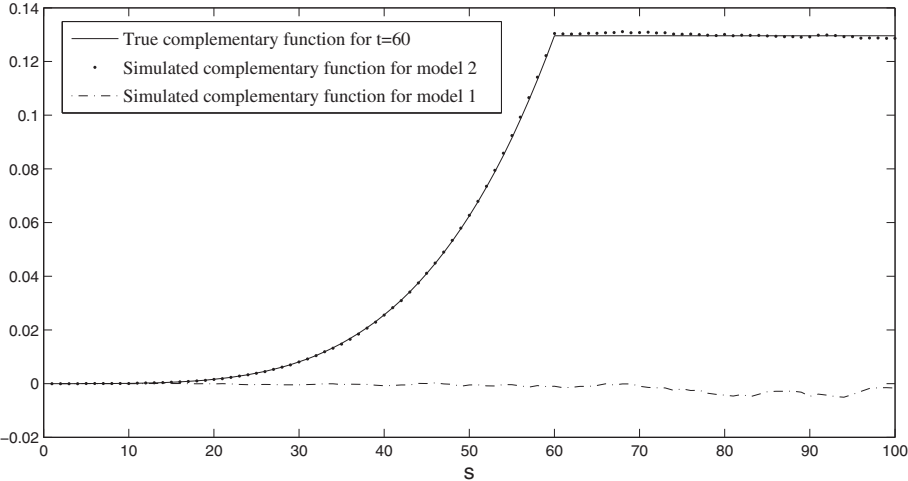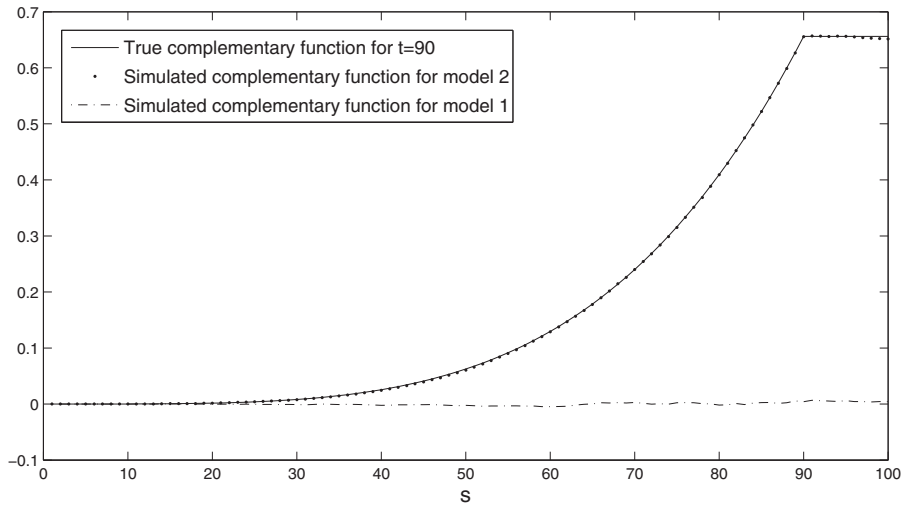

Supplement: 13634_2012_412_MOESM2_ESM.pdf [file 13634_2012_412_MOESM2_ESM.pdf]
